# Supplementary material for: Surface Expression of CD63 and HLA-DR in circulating eosinophils correlates with Improved Clinical Control After Treatment Optimization in asthma
Source: Research Square preprint supplement (doi:10.21203/rs.3.rs-7923148/v1), 2025-11-28
Supplement: Supplementary file 2 [file dfc9c8466abe4960db902c4f.pdf]

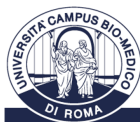

## PROTOCOLLO

### STUDIO OSSERVAZIONALE NO PROFIT

|                                   |                                                                                                                                                                                                                                                                                                                                                                                                                                                                                                                                                                                                                                                                                           |
|-----------------------------------|-------------------------------------------------------------------------------------------------------------------------------------------------------------------------------------------------------------------------------------------------------------------------------------------------------------------------------------------------------------------------------------------------------------------------------------------------------------------------------------------------------------------------------------------------------------------------------------------------------------------------------------------------------------------------------------------|
| <b>Titolo dello Studio:</b>       | Analisi citofluorimetrica dell'attività eosinofila mediata dall'espressione dei marcatori di membrana cellulare in soggetti con asma grave: caratterizzazione basale e verifica dei cambiamenti indotti dalla terapia con farmaci biologici.                                                                                                                                                                                                                                                                                                                                                                                                                                              |
| <b>Codice del Protocollo:</b>     | EoAG                                                                                                                                                                                                                                                                                                                                                                                                                                                                                                                                                                                                                                                                                      |
| <b>Versione del Protocollo:</b>   | 3.0                                                                                                                                                                                                                                                                                                                                                                                                                                                                                                                                                                                                                                                                                       |
| <b>Data:</b>                      | 09/12/2022                                                                                                                                                                                                                                                                                                                                                                                                                                                                                                                                                                                                                                                                                |
| <b>Promotore:</b>                 | UCBM<br>Via Alvaro del Portillo, 200 Roma 00128                                                                                                                                                                                                                                                                                                                                                                                                                                                                                                                                                                                                                                           |
| <b>Sperimentatore Principale:</b> | Simone Scarlata - MD, Campus Bio Medico University and Teaching Hospital – Rome<br>s.scarlata@policlinicocampus.it                                                                                                                                                                                                                                                                                                                                                                                                                                                                                                                                                                        |
| <b>Altri Sperimentatori:</b>      | Carmen Mazzuca - MD, Campus Bio Medico University and Teaching Hospital – Rome;<br><a href="mailto:c.mazzuca@policlinicocampus.it">c.mazzuca@policlinicocampus.it</a><br>Marta Vadacca - MD, Campus Bio Medico University and Teaching Hospital – Rome;<br><a href="mailto:m.vadacca@policlinicocampus.it">m.vadacca@policlinicocampus.it</a><br>Amelia Rigon - MD, Campus Bio Medico University and Teaching Hospital – Rome;<br><a href="mailto:a.rigon@policlinicocampus.it">a.rigon@policlinicocampus.it</a><br>Danila Zennaro - MD, Campus Bio Medico University and Teaching Hospital – Rome;<br><a href="mailto:d.zennaro@policlinicocampus.it">d.zennaro@policlinicocampus.it</a> |



Davide Fontana - MD, Campus Bio Medico  
University and Teaching Hospital – Rome;

[d.fontana@policlinicocampus.it](mailto:d.fontana@policlinicocampus.it)

Arianna Aruanno - MD, Fondazione Policlinico  
Universitario A. Gemelli IRCCS, Rome, Italy;

[arianna.aruanno@policlinicogemelli.it](mailto:arianna.aruanno@policlinicogemelli.it)

Angela Rizzi - MD, Fondazione Policlinico  
Universitario A. Gemelli IRCCS, Rome, Italy;

[angela.rizzi@policlinicogemelli.it](mailto:angela.rizzi@policlinicogemelli.it)

Eleonora Nucera - MD, Fondazione Policlinico  
Universitario A. Gemelli IRCCS, Rome, Italy;

[eleonora.nucera@policlinicogemelli.it](mailto:eleonora.nucera@policlinicogemelli.it)

Laura Vitiello – Ph.D, IRCCS San Raffaele Pisana  
– Rome; [laura.vitiello@sanraffaele.it](mailto:laura.vitiello@sanraffaele.it)

Vittorio Cardaci - MD, IRCCS San Raffaele Pisana  
– Rome; [vittorio.cardaci@sanraffaele.it](mailto:vittorio.cardaci@sanraffaele.it)

---

#### Lista Centri Partecipanti

|                                                                         |                                                                                                                                                                                   |
|-------------------------------------------------------------------------|-----------------------------------------------------------------------------------------------------------------------------------------------------------------------------------|
| <b>I.R.C.S.S. San Raffaele Pisana</b>                                   | Laura Vitiello – Ph.D, IRCCS San Raffaele Pisana - Rome<br>Vittorio Cardaci- MD, IRCCS San Raffaele Pisana- Rome                                                                  |
| <b>Fondazione Policlinico Universitario Agostino Gemelli I.R.C.S.S.</b> | Arianna Aruanno - MD, Fondazione Policlinico Universitario A. Gemelli IRCCS, Rome, Italy<br>Angela Rizzi - MD, Fondazione Policlinico Universitario A. Gemelli IRCCS, Rome, Italy |
| <b>Sperimentatore Principale, centro partecipante:</b>                  | Eleonora Nucera - MD, Fondazione Policlinico Universitario A. Gemelli IRCCS, Rome, Italy                                                                                          |

---



### Informazioni di Contatto

|                                              |                                                                                                                                                                                                                                                             |
|----------------------------------------------|-------------------------------------------------------------------------------------------------------------------------------------------------------------------------------------------------------------------------------------------------------------|
| <b>Nome Contatto Promotore</b><br>UCBM       | Simone Scarlata - MD, Campus Bio Medico<br>University and Teaching Hospital – Rome<br>s.scarlata@policlinicocampus.it<br>Raffaele Antonelli Incalzi - MD, Campus Bio<br>Medico University and Teaching Hospital –<br>Rome; r.antonelli@policlinicocampus.it |
| <b>Nome Contatto per la Farmacovigilanza</b> | Dott. Di Mattia Andrea                                                                                                                                                                                                                                      |

### APPROVAZIONE DEL PROTOCOLLO

Gli Sperimentatori:

- approvano il presente Protocollo;
- dichiarano che lo studio verrà condotto in conformità a quanto riportato nel presente protocollo.

Scarlata Simone

19/12/2022  
Data

Mazzuca Carmen

19/12/2022  
Data

Fontana Davide Onofrio

19/12/2022  
Data

Rigon Amelia

19/12/2022  
Data

Vadacca Marta

19/12/2022  
Data

Zennaro Danila

19/12/2022  
Data

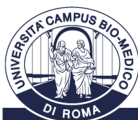

Vitiello Laura

19/12/2022

Data

Aruanno Arianna

19/12/2022

Data

Rizzi Angela

19/12/2022

Data

Nucera Eleonora

19/12/2022

Data



## Indice

|                                                                 |                                              |
|-----------------------------------------------------------------|----------------------------------------------|
| Background e razionale .....                                    | 6                                            |
| Obiettivi dello studio .....                                    | 7                                            |
| Disegno dello studio .....                                      | 7                                            |
| Setting.....                                                    | 9                                            |
| Popolazione in studio .....                                     | 10                                           |
| Criteri di inclusione.....                                      | <b>Errore. Il segnalibro non è definito.</b> |
| Criteri di esclusione .....                                     | <b>Errore. Il segnalibro non è definito.</b> |
| Esiti dello Studio .....                                        | 10                                           |
| Variabili .....                                                 | <b>Errore. Il segnalibro non è definito.</b> |
| Bias .....                                                      | <b>Errore. Il segnalibro non è definito.</b> |
| Dimensione del campione .....                                   | 11                                           |
| Procedura di arruolamento .....                                 | 11                                           |
| Procedura di follow-up .....                                    | 11                                           |
| Definizione di conclusione dello studio .....                   | 11                                           |
| Gestione dei dati .....                                         | 11                                           |
| Raccolta dei dati .....                                         | 11                                           |
| Gestione dei dati.....                                          | 12                                           |
| Conservazione dei dati .....                                    | <b>Errore. Il segnalibro non è definito.</b> |
| Piano statistico .....                                          | 12                                           |
| Gestione della sicurezza .....                                  | 13                                           |
| Aspetti amministrativi .....                                    | 13                                           |
| Finanziamenti dello studio .....                                | 13                                           |
| Considerazioni etiche .....                                     | 13                                           |
| Acquisizione del consenso informato e trattamento dei dati..... | 14                                           |
| Conflitto di interessi.....                                     | 14                                           |
| Responsabilità e politiche di pubblicazione.....                | 14                                           |
| Ruolo del promotore e degli sperimentatori .....                | 14                                           |
| Proprietà dei dati .....                                        | 14                                           |
| Politiche di pubblicazione .....                                | 14                                           |
| Bibliografia.....                                               | 14                                           |

## Background e razionale

L'asma è una malattia eterogenea, caratterizzata da un'ostruzione reversibile del flusso d'aria, iperreattività ed infiammazione delle vie aeree (1); circa nel 40% dei casi la patogenesi è guidata dagli eosinofili (1, 2). Il trattamento principale prevede l'uso di corticosteroidi in grado di indurre una riduzione degli eosinofili, condizione attualmente considerata fattore predittivo di risposta al trattamento.

Secondo recenti evidenze la prevalenza mondiale dell'asma è di circa 300 milioni di casi ed è stimata in aumento (4, 5). Circa il 5-10% dei pazienti asmatici presenta una forma "grave".

Si definisce tale quando c'è una richiesta di una dose alta di corticosteroidi inalatori (ICS) oltre che farmaci ad altro meccanismo d'azione (incluso lo steroide orale-OCS) per evitare che diventi "incontrollato" o che rimanga "incontrollato" nonostante la terapia. Questo sottogruppo di pazienti ha un'elevata probabilità di andare incontro a riacutizzazioni e quando tale stato persiste nonostante l'ottimizzazione della terapia si parla di "asma severa incontrollata" (6, 7). Questi pazienti hanno una peggiore qualità di vita, più alti tassi di morbidità e mortalità e fanno ricorso alle risorse sanitarie in maniera sproporzionatamente elevata se confrontati per età ai pazienti con asma controllata.

La fisiopatologia dell'asma è complessa ed eterogenea. Tuttavia, sulla base del tipo di coinvolgimento del sistema immunitario, è possibile definire 2 endotipi di asma. In base al livello di produzione delle citochine prodotte dai linfociti T helper 2 (Th2), ovvero IL-4, IL-5 e IL-13, si distinguono l'endotipo Th2 a bassa ed alta espressione (11, 12). L'endotipo Th2 ad alta espressione si caratterizza per un aumento del numero di eosinofili a livello ematico e a livello dell'espettorato oltre che per una migliore risposta alle attuali terapie biologiche disponibili, come il mepolizumab (anticorpo anti IL-5) o l'omalizumab (anticorpo anti-IgE) (14).

Nell'asma, gli eosinofili svolgono un importante ruolo sia nel contesto dell'immunità innata che in quella adattiva, è stato infatti dimostrato un loro coinvolgimento nell'attivazione e nella proliferazione dei linfociti T (15). Entrano in gioco nella patogenesi dell'asma mediante il rilascio del contenuto dei loro granuli: enzimi idrolitici, perossidasi, EDN (neurotossina derivata da eosinofili), e proteina cationica (16). Oltre a questi mediatori, gli eosinofili rilasciano anche citochine, come IL-4, IL-2 e TGF- $\beta$ . La degranolazione degli eosinofili può essere rilevata in vitro o in vivo analizzando l'espressione della molecola CD63, proteina di membrana up-regolata dalla degranolazione (16).

In condizione di infiammazione, in risposta alle citochine Th2 e alle chemochine (CCL5, eotassine 1, 2 e 3), gli eosinofili regolano l'espressione dei recettori delle chemochine (come CCR3) (17,18). Un'altra importante molecola coinvolta nella biologia degli eosinofili è il CD125, recettore della IL-5, altamente espresso durante l'eosinofiloipoiesi.

**Ipotesi:** L'asma eosinofila è associata ad un fenotipo clinico più grave ma i pazienti con endotipo Th2 ad alta espressione rispondono meglio alle terapie biologiche. La nostra ipotesi è che lo stato di attivazione di queste cellule, analizzato attraverso l'espressione di marcatori di attivazione, possa essere utilizzato per definire un nuovo e diverso endotipo, in cui gli eosinofili, sebbene quantitativamente bassi o normali, sono qualitativamente più attivi ed aggressivi, svolgendo quindi un ruolo da indicatore della progressione verso un endotipo Th2 alto. In tal caso, i pazienti con un endotipo caratterizzato da

eosinofili attivati potrebbero essere idonei e responsivi alle terapie biologiche indipendentemente dall'iperespressione cellulare. Inoltre, verificheremo se una diversa espressione di queste molecole di superficie dell'eosinofilo possa essere associata ad una diversa risposta clinica ai farmaci biologici.

## Obiettivi dello studio

### Obiettivo Primario

Descrivere l'espressione delle molecole di membrana relative allo stato di attivazione degli eosinofili (fenotipo) nei pazienti asmatici e determinare il suo ruolo predittivo in risposta al trattamento biologico. Verificheremo anche se un particolare fenotipo può essere utilizzato come firma molecolare di un endotipo asmatico.

### Obiettivi Secondari

- (i) Verificare se una popolazione di pazienti che presentano un fenotipo di eosinofili pro-infiammatori, anche con un numero di eosinofili da basso a normale, possa presentare le caratteristiche cliniche di asma grave e refrattaria;
- (ii) Valutare se il trattamento biologico è in grado di determinare le variazioni longitudinali nell'espressione delle molecole di membrana degli eosinofili dopo 12 mesi di trattamento
- (iii) Valutare e confrontare l'espressione delle molecole di membrana relative allo stato di attivazione degli eosinofili (fenotipo) nei pazienti affetti da BPCO nonché nei pazienti sani.

## Disegno dello studio

I soggetti che soddisfano i criteri di eleggibilità saranno invitati a partecipare allo studio; tutti riceveranno una spiegazione dettagliata della natura dello studio, degli scopi e degli obiettivi.

Dopo aver firmato il consenso informato, i pazienti saranno valutati clinicamente e ne verrà eventualmente modificato il trattamento domiciliare. Sarà pianificata una nuova visita ed un prelievo ematico dopo il periodo di run-in (3 mesi), necessario a valutare la risposta all'ottimizzazione del trattamento medico precedentemente proposto ed eventualmente confermare la diagnosi di asma grave.

Dopo il periodo di run-in ( $T'1/2$ ), i pazienti saranno assegnati a due gruppi, in base al loro stato clinico: gruppo asma controllato (gruppo A) e gruppo asma grave refrattaria (gruppo B). Nel gruppo B sarà prescritta la terapia con Mepolizumab o Omalizumab, secondo le linee guida e le raccomandazioni standard. A  $T'1/2$ , verrà eseguito un prelievo ematico necessario per lo studio del fenotipo eosinofilico mediante citometria a flusso (vedi sotto). Una rivalutazione clinica completa sarà ottenuta a 6 e 12 mesi ( $T'1$ ).

I campioni di sangue per le analisi di citofluorimetria saranno ottenuti al momento del reclutamento ( $T'0$ ), dopo che il consenso informato è stato ottenuto, a  $T'1/2$  e  $T'1$ . Tutti i campioni saranno adeguatamente conservati e spediti per l'analisi, secondo gli standard di gestione dei campioni biologici, entro 6 ore dal prelievo del campione.



- **Valutazione al baseline (T'0):**

Dopo la firma del consenso informato, verrà esaminata la storia clinica del paziente con particolare attenzione all'anamnesi allergologica e alle principali comorbidità. Verranno effettuati un esame obiettivo completo e test di funzionalità respiratoria, ovvero una spirometria semplice e una determinazione del volume residuo. Nel caso di una prima diagnosi di asma verrà altresì eseguito il test di broncodilatazione o un test di provocazione con la metacolina. Invece, in caso di diagnosi di asma preesistente, saranno valutati i risultati di precedenti esami che confermino e comprovino la diagnosi.

- *Criteri per la diagnosi di asma:* la diagnosi di asma sarà effettuata secondo le raccomandazioni della Global Initiative for Asthma (GINA), brevemente riassunte come segue: 1) storia di sintomi respiratori variabili (respiro affannoso, respiro corto, tenuta toracica, tosse), che si verificano in modo variabile nel tempo e di intensità variabile, spesso peggiore di notte o al risveglio, e scatenati da esercizio fisico, risate, allergeni o aria fredda, e che peggiorano con infezioni virali; 2) evidenza di una limitazione variabile del flusso d'aria espiratoria almeno una volta durante il lavoro diagnostico, documentando che il rapporto FEV1/FVC è inferiore al limite inferiore della normalità e che è presente una maggiore variabilità del flusso d'aria, dimostrata da un incremento >200 ml e >12% del valore di riferimento FEV1 dopo l'inalazione di un broncodilatatore. Quando indicato, si dovrebbe ottenere un test di broncodilatazione bronchiale.
- *Criteri per la definizione di asma grave:* forma di asma che "richiede un trattamento con corticosteroidi inalatori ad alte dosi (ICS) oltre che farmaci ad altro meccanismo d'azione (incluso OCS) per evitare che diventi "incontrollato" o che rimanga "incontrollato" nonostante questa terapia". Questa definizione include i casi in cui tali trattamenti sono stati interrotti per mancato raggiungimento di una risposta clinica.

- **Strumenti di valutazione raccolti a T'0, T'1/2 e T'1:**

- *Valutazione clinica:* Asma Control Test (ACT), regime terapeutico di fondo e terapia di emergenza (OCS e dose media giornaliera di ICS), numero di esacerbazioni acute nei 6 mesi precedenti, necessità di visite mediche non programmate, assenze lavorative, ricoveri ospedalieri.
- *Valutazione funzionale:*
  - (i) *Test di funzionalità polmonare:* Le curve spirometria e flusso-volume saranno ottenute secondo le attuali linee guida (20). Il volume residuo e la capacità polmonare totale (TLC) saranno misurati utilizzando la tecnica di diluizione dell'elio. Al fine di confermare la diagnosi di asma, verrà eseguito il test di reversibilità con broncodilatatore o il challenge test con la metacolina (21) e la dose bronco-provocativa (PD20) quando disponibile verrà segnalata. Tutti i valori sono espressi come percentuali dei valori previsti calcolati utilizzando le equazioni di riferimento standard (22).
  - (ii) *Determinazione del FeNO:* Le misurazioni della FeNO saranno effettuate al mattino, sotto la direzione di un tecnico esperto, secondo le raccomandazioni proposte dall'American Thoracic Society (23). La misurazione avverrà mediante un dispositivo portatile (NIOX-VERO®; Aerocrine AB, Solna, Svezia) ed espresso in parti per miliardo (ppb). I partecipanti saranno seduti senza clip nasale, inaleranno fino alla capacità polmonare totale, per poi espirare ad una portata costante di 50 mL/s come guidato da



un indicatore di livello oculare per circa 10 s. Verranno ottenute due determinazioni di FeNO ed i loro valori medi saranno registrati per l'analisi.

(iii) *Determinazione dei biomarcatori*: conta eosinofila, sia in valore assoluto che in % della conta totale dei globuli bianchi totali, dosaggio delle IgE totali.

- Citofluorimetria:

Valuteremo, mediante citometria a flusso a fluorescenza, l'espressione delle molecole di membrana degli eosinofili, utilizzando un protocollo di colorazione di sangue intero, in modo che i campioni vengano manipolati al minimo al fine di minimizzare gli artefatti.

I campioni di sangue periferico verranno elaborati entro 2 ore dal prelievo e saranno conservati a temperatura ambiente fino all'elaborazione. Eseguiremo la colorazione su 200 µl di sangue, utilizzando anticorpi coniugati con fluorocromi diretti verso le molecole di superficie degli eosinofili. In particolare, useremo anticorpi contro CD45, CD66, CD15, CD16 e Siglec-8, per identificare gli eosinofili; CD63, CD294 (CRTH2, recettore della prostaglandina D2), CD125 (recettore dell'IL-5), CD193 (recettore di diverse chemochine, tra cui RANTES, Eotassina, MCP-3, MIP1α), e HLA-DR: l'espressione di queste molecole è potenziata dall'attivazione degli eosinofili e pertanto possono essere iperesprese nei pazienti con asma grave. Dopo 30 minuti di incubazione a 4°C si aggiunge la soluzione lisante FACS (BD Bioscience) per rimuovere gli eritrociti, secondo le istruzioni del produttore. I campioni saranno risospesi in soluzione tampone fosfato (PBS) e acquisiti su un citometro a flusso LSRFortessa X-20 (BD Bioscience), dotato di quattro laser. Eseguiremo l'analisi utilizzando il software FlowJo.

- Esecuzione e consegna dei campioni biologici:

Il campione ematico verrà raccolto in provette di plastica K2EDTA ed immediatamente contrassegnato ed etichettato.

La misurazione degli eosinofili e dei livelli di IgE totali sarà effettuata dal laboratorio di analisi del centro di reclutamento. Verrà applicata una copertura standard di spesa di circa 100 euro, incluso un bonus extra di 36 euro in caso di completamento di tutte le misure di follow up per ogni paziente.

Il campione di sangue che sarà sottoposto a citometria a flusso sarà imballato a temperatura ambiente e spedito tramite corriere espresso entro 6 ore.

Tutte le citofluorimetrie saranno effettuate entro 24 ore dal prelievo del sangue.

## Setting

Studio multicentrico:

- Fondazione Policlinico Universitario Campus Bio Medico, Centro di Coordinamento: arruolamento pazienti, valutazione clinica e successivo trattamento farmacologico, follow up.
- Fondazione Policlinico Universitario A. Gemelli, Centro partecipante: arruolamento pazienti, valutazione clinica e successivo trattamento farmacologico, follow up.
- IRCSS San Raffaele: Analisi citofluorimetriche.

## Popolazione in studio

Verranno reclutati pazienti adulti, non fumatori, con diagnosi confermata di asma grave secondo le raccomandazioni attualmente disponibili (18, 19). Sulla base dei flussi diagnostici precedentemente osservati, prevediamo di reclutare 80 pazienti con asma controllata e 80 soggetti con asma grave in circa 6-9 mesi. Provvederemo inoltre a reclutare come gruppo di controllo 20 pazienti sani e 20 pazienti affetti da BPCO.

### Criteri di inclusione:

Pazienti, di età maggiore di 18 anni, con diagnosi di asma eosinofila grave, compensata o refrattaria, secondo le raccomandazioni del GINA e le linee guida internazionali ERS/ATS (18, 19) che accettano di partecipare a questo studio e firmano un consenso informato.

### Criteri di esclusione:

- malattie concomitanti che richiedono la somministrazione cronica di immunosoppressori, farmaci biologici o corticosteroidi sistemici per qualsiasi malattia diversa dall'asma;
- storia di malattie, acute o croniche, precedenti o concomitanti, note per influenzare direttamente o indirettamente la conta degli eosinofili, sia in modo quantitativo che qualitativo (malattie eosinofile polmonari e gastrointestinali, vasculite sistemica, aspergillosi broncopolmonare allergica, infezioni parassitarie, ecc.)
- incapacità o rifiuto di firmare il consenso informato.

## Esiti dello Studio

### **Main outcome**

L'espressione delle molecole di membrana relative allo stato di attivazione degli eosinofili (fenotipo) nei pazienti asmatici verrà determinato al momento della diagnosi, al termine del periodo di run-in, ed al completamento del periodo di FU. Verranno identificate le caratteristiche dell'espressione recettoriale e molecolare degli eosinofili, le modificazioni avvenute e riconducibili al trattamento e al ruolo predittivo di specifici recettori della risposta al trattamento biologico. Verificheremo anche se un particolare fenotipo può essere utilizzato come firma molecolare di un endotipo asmatico.

### **Secondary outcomes**

Al termine del periodo di reclutamento verrà inoltre verificata: a) l'associazione tra specifici pattern di espressione molecolare sulla superficie degli eosinofili e quadro clinico di asma grave-refrattaria; b) il decorso clinico (gravità dei sintomi, numero di riacutizzazioni, tasso di ospedalizzazione, consumo di risorse, ricorso a terapia rescue, consumo di corticosteroidi sistemici etc) dei pazienti in relazione all'espressione di peculiari pool molecolari sulla superficie degli eosinofili; c) il confronto tra specifici pattern di espressione molecolare di superficie degli eosinofili espressi da pazienti affetti da asma grave-refrattaria e pazienti sani, nonché affetti da BPCO.

### **Bias**

Al fine di minimizzare errori di campionamento la gestione clinica dei pazienti e la loro relativa classificazione clinica avverrà in stretta conformità con le attuali linee guida internazionali per la

multidisciplinare che coinvolga specialisti in allergologia consentirà di ottimizzare la fase di diagnostica differenziale ed escludere patologie alternative all'asma. Frequenti contatti telefonici mireranno a sensibilizzare il paziente garantendo i più alti livelli di aderenza e compliance alle cure previste dal protocollo.

### **Dimensione del campione**

Il numero richiesto di soggetti, assumendo una potenza statistica dell'80% ed un errore di tipo I del 5% (valore  $p = 0,05$ ) è di 67 individui in ogni gruppo, con un totale di 134 pazienti da reclutare. Poiché c'è la possibilità di perdita di pazienti nel follow up, prevediamo di reclutare 80 pazienti per ogni gruppo, per essere sicuri che la dimensione minima richiesta del campione venga raggiunta.

### **Procedura di arruolamento**

Verranno valutati per l'arruolamento tutti i pazienti afferenti all'ambulatorio di pneumologia e/o di allergologia del Policlinico Campus BioMedico e all'ambulatorio di Allergologia del Policlinico A. Gemelli con una diagnosi di asma eosinofilico, sia compensato che refrattario, oltre che pazienti affetti da BPCO e pazienti sani.

Qualora siano rispettati i criteri di eleggibilità i soggetti saranno invitati a partecipare allo studio e dopo aver ricevuto adeguata spiegazione circa la natura dello studio, gli scopi e gli obiettivi, prenderanno visione e firmeranno consenso informato.

Alla prima visita (T'0) verranno sottoposti a valutazione clinica, prelievo ematico e eventuale potenziamento della terapia domiciliare.

### **Procedura di follow-up**

La I visita di follow-up (T'1/2) viene programmata dopo il periodo di run-in di 3 mesi. Durante la visita di rivalutazione, alla luce della risposta all'ottimizzazione della terapia, i pazienti verranno assegnati al gruppo dell'Asma Controllato (Gruppo A) o al gruppo di Asma Refrattaria (Gruppo B) ed in quest'ultimo caso verrà prescritta terapia con Mepolizumab o Omalizumab. Verrà quindi effettuato il secondo prelievo ematico per l'esame citofluorimetrico.

Saranno quindi programmate due visite di follow-up a dopo 6 e 12 mesi (T'1) durante le quali è prevista un'attenta valutazione clinica e l'esecuzione del prelievo ematico.

### **Definizione di conclusione dello studio**

Lo studio si riterrà concluso in seguito alla raccolta dati della II visita di follow-up (T'1).

## **Gestione dei dati**

### **Raccolta dei dati**

Alla visita baseline (T'0), in accordo con la CRF, verranno raccolti i seguenti dati:

- Dati anagrafici (genere, etnia, età anagrafica, peso, altezza, BMI, età anagrafica), fumo attivo/passivo, esposizione ambientale, esposizione professionale, età alla diagnosi, asma allergico, pattern di sensibilizzazione, immunoterapia pregressa/attuale, termoplastica, comorbidità;

- Asma Control Test (ACT), numero di riacutizzazioni negli ultimi 6 mesi, regime terapeutico di fondo e terapia di emergenza (OCS e dose media giornaliera di ICS), necessità di visite mediche non programmate, assenze lavorative, ricoveri ospedalieri
- Prove di funzionalità respiratoria: FEV1 pre e postbroncodilatatore, FVC pre e postbroncodilatatore, FEV1/FVC pre e postbroncodilatatore, PEF pre e postbroncodilatatore;
- Determinazione FeNO
- Emocromo con formula, dosaggio IgE

Alle visite di follow-up T'1/2 e T'1, in accordo con la CRF, verranno raccolti i seguenti dati:

- Asma Control Test (ACT), numero di riacutizzazioni negli ultimi 6 mesi, regime terapeutico di fondo e terapia di emergenza (OCS e dose media giornaliera di ICS), necessità di visite mediche non programmate, assenze lavorative, ricoveri ospedalieri
- Prove di funzionalità respiratoria: FEV1 pre e postbroncodilatatore, FVC pre e postbroncodilatatore, FEV1/FVC pre e postbroncodilatatore, PEF pre e postbroncodilatatore;
- Determinazione FeNO
- Emocromo con formula, dosaggio IgE

### Gestione e conservazione dei dati

La proprietà dei dati, trattandosi di studio indipendente ai sensi del D.M. 17 Dicembre 2004, appartiene al Promotore dello Studio (D.M. 17 Dicembre 2004, Art. 1, comma 2, lettera c). La pubblicazione dei dati derivanti dal presente studio avverrà indipendentemente dai risultati ottenuti. La trasmissione o diffusione dei dati, per il tramite di pubblicazioni scientifiche e/o di presentazione in congressi, convegni e seminari, partecipazione a studi multicentrici, avverrà esclusivamente a seguito di un'elaborazione meramente statistica degli stessi, o comunque in forma assolutamente anonima.

### Piano statistico

Al fine di stimare la dimensione ottimale del campione per confrontare il livello di espressione delle molecole di membrana sugli eosinofili nei pazienti del gruppo A e del gruppo B, abbiamo effettuato un calcolo della potenza basato sul valore di riferimento della proteina CCR3 nei controlli sani provenienti dalla letteratura disponibile. Abbiamo scelto questo antigene perché è il recettore della CCL11, una chemochina che spinge le chemiotassi degli eosinofili verso i tessuti infiammati. Si stima che l'aumento atteso del livello di CCR3 raggiunga il 20% nei pazienti asmatici gravi, il che significa un valore di 28050 MFI (intensità mediana di fluorescenza, valutata con la citometria a flusso) rispetto al valore di base di 23000 MFI. La deviazione standard comune stimata è 5000 MFI. Il numero richiesto di soggetti, assumendo una potenza statistica dell'80% ed un errore di tipo I del 5% (valore  $p = 0,05$ ) è di 67 individui in ogni gruppo, con un totale di 134 pazienti da reclutare. Poiché c'è la possibilità di perdita di pazienti nel follow up, prevediamo di reclutare 80 pazienti per ogni gruppo, per essere sicuri che la dimensione minima richiesta del campione venga raggiunta. Il reclutamento sarà effettuato su basi competitive e per ogni paziente iscritto sarà garantito un rimborso spese forfetario (vedi oltre alla sezione budget).

L'analisi statistica sarà effettuata utilizzando il software statistico SPSS (versione 23.0). Valuteremo tutti i dati raccolti per verificare se mostrano una distribuzione normale. I risultati saranno riportati utilizzando statistiche descrittive: media e deviazione standard (SD) per le variabili continue, frequenza e percentuale

(%) per le variabili categoriche. Le caratteristiche del partecipante, inoltre, saranno confrontate utilizzando il t-test non accoppiato e accoppiato e il test del Chi-quadrato a seconda delle necessità, mentre le caratteristiche del gruppo saranno confrontate utilizzando l'ANOVA. Eseguiamo l'analisi Post-hoc utilizzando il Tukey Test. Utilizzeremo il test Shapiro-Wilks e il metodo di valutazione grafica per scegliere il test statistico appropriato (parametrico o non parametrico). Le differenze saranno considerate significative quando  $p < 0.05$ .

## Gestione della sicurezza

In caso di avventi avversi (ADR) durante la terapia con farmaci biologici si provvederà alla pronta sospensione della stessa e alla segnalazione AIFA entro 36 ore attraverso il sito Vigifarmaco oppure compilando la scheda di segnalazione di ADR indirizzata al Responsabile della farmacovigilanza dell'UCBM.

## Aspetti amministrativi

### Finanziamenti dello studio

Lo studio clinico è da intendersi come NO-PROFIT. L'ente Finanziatore (GSK) si impegna a corrispondere il finanziamento dello studio secondo la seguente milestone:

- EURO 7.700,00 (settemilasettecentosettanta/zero) + I.V.A., al ricevimento della raccomandata di cui all'art. 2 (i), a titolo di primo acconto;
- EURO 30.670,00 (trentamilaseicentosettanta/zero) + I.V.A. all'arruolamento del primo paziente, a titolo di secondo acconto;
- EURO 30.670,00 (trentamilaseicentosettanta/zero) + I.V.A. all'arruolamento del 25% dei pazienti previsti dal protocollo, a titolo di terzo acconto;
- EURO 30.670,00 (trentamilaseicentosettanta/zero) + I.V.A. all'arruolamento del 50% dei pazienti previsti dal protocollo, a titolo di quarto acconto;
- EURO 23.000,00 (ventitremila/zero) + I.V.A. all'arruolamento di tutti i pazienti previsti dal protocollo, a titolo di quinto acconto;
- EURO 30.640,00 (trentamilaseicentoquaranta/zero) + I.V.A. al termine della Sperimentazione, a saldo, previa consegna a GSK di quanto previsto all'art. 8(e) e pubblicazione del riepilogo dei risultati nel sito AIFA, nonché invio a rivista specializzata.

In nessun caso tale emendamento richiederà un ampliamento dei fondi di ricerca già previsti e stanziati.

## Considerazioni etiche

Non vi sono rischi fisici, psichici e sociali nelle procedure che saranno seguite nella ricerca. Verrà richiesto il rilascio del consenso informato scritto da parte dei soggetti coinvolti. Il protocollo sarà sottoposto ad approvazione del Comitato Etico di riferimento prima di iniziare la ricerca ed eventuali successive modifiche dovranno prima essere valutate dal Comitato Etico.

## **Acquisizione del consenso informato e trattamento dei dati**

I pazienti che soddisfano i criteri di eleggibilità saranno invitati a partecipare allo studio. I soggetti riceveranno una spiegazione dettagliata della natura dello studio, degli scopi e degli obiettivi.

Verrà pertanto raccolto, firmato in duplice copia (una per il paziente ed una per lo sperimentatore), il consenso informato alla partecipazione allo studio, l'informativa sul trattamento dei dati personali comuni e particolari per ricerca scientifica e il consenso informato alla raccolta del campione biologico.

## **Conflitto di interessi**

Nessuno degli sperimentatori presenta conflitti di interesse.

## **Responsabilità e politiche di pubblicazione**

### **Ruolo del promotore e degli sperimentatori**

Il promotore è responsabile del disegno dello studio.

Il PI è responsabile della gestione, analisi e interpretazione dei dati, scrittura dei report.

Gli sperimentatori sono responsabili della raccolta e gestione dei dati.

### **Proprietà dei dati**

La proprietà dei dati del presente studio appartiene al promotore che la condivide con gli sperimentatori principali.

### **Politiche di pubblicazione**

Non appena disponibili, i risultati del presente studio verranno resi pubblici e diffusi attraverso i previsti canali scientifici (pubblicazioni in riviste peer reviewed, congressi, panel di esperti, etc) o mainstream (radio, televisione, canali di divulgazione scientifica, etc)

## **Bibliografia**

1. Hargreave FE, Nair P. The definition and diagnosis of asthma. Clin Exp Allergy 2009;39(11):1652–8.
2. D'Silva L, Hassan N, Wang HY, et al. Heterogeneity of bronchitis in airway diseases in tertiary care clinical practice. Can Respir J 2011;18(3):144–8.
3. Nair P, Dasgupta A, Brightling CE, et al. How to diagnose and phenotype asthma. Clin Chest Med 2012;33(3):445–57.
4. To T, Stanojevic S, Moores G, Gershon AS, Bateman ED, Cruz AA, et al. Global asthma prevalence in adults: findings from the cross-sectional world health survey. BMC Public Health 2012;12:204.
5. Masoli M, Fabian D, Holt S, Beasley R, Global Initiative for Asthma (GINA) Program. The global burden of asthma: executive summary of the GINA Dissemination Committee report. Allergy 2004;59:469–78.
6. Papiris S, Kotanidou A, Malagari K, Roussos C. Clinical review: severe asthma. Crit Care 2002;6:30–44.
7. Hermosa JL, Sanchez CB, Rubio MC, Minguez MM, Walther JL. Factors associated with the control of severe asthma. J Asthma 2010;47:124–30.

8. Luskin AT, Chipps BE, Rasouliyan L, Miller DP, Haselkorn T, Dorenbaum A. Impact of asthma exacerbations and asthma triggers on asthma-related quality of life in patients with severe or difficult-to-treat asthma. *J Allergy Clin Immunol Pract* 2014;2:544-52. e1-2.
9. Hossny E, Caraballo L, Casale T, El-Gamal Y, Rosenwasser L. Severe asthma and quality of life. *World Allergy Organ J* 2017;10:28.
10. McFadden ER Jr, Warren EL. Observations on asthma mortality. *Ann Intern Med* 1997;127:142-7.
11. Stokes JR, Casale TB. Characterization of asthma endotypes: implications for therapy. *Ann Allergy Asthma Immunol* 2016;117:121-5.
12. Robinson D, Humbert M, Buhl R, Cruz AA, Inoue H, Korom S, et al. Revisiting type 2-high and type 2-low airway inflammation in asthma: current knowledge and therapeutic implications. *Clin Exp Allergy* 2017;47:161-75.
13. Pepper AN, Renz H, Casale TB, Garn H. Biologic therapy and novel molecular targets of severe asthma. *J Allergy Clin Immunol Pract* 2017;5:909-16.
14. Gould HJ, Sutton BJ. IgE in allergy and asthma today. *Nat Rev Immunol*. 2008;8(3):205–217.
15. Lacy P, Moqbel R. Immune effector functions of eosinophils in allergic airway inflammation. *Curr Opin Allergy Clin Immunol* 2001;1(1):79–84.
16. Carmo LA, Bonjour K, Ueki S, et al. CD63 is tightly associated with intracellular, secretory events chaperoning piecemeal degranulation and compound exocytosis in human eosinophils. *J Leukoc Biol*. 2016 Aug;100(2):391-401
17. Zimmermann N, Hershey GK, Foster PS, et al. Chemokines in asthma: cooperative interaction between chemokines and IL-13. *J Allergy Clin Immunol* 2003;111(2):227–42 [quiz: 243].
18. Rankin SM, Conroy DM, Williams TJ. Eotaxin and eosinophil recruitment: implications for human disease. *Mol Med Today* 2000;6(1):20–7.
19. Chung KF, Wenzel SE, Brozek JL, Bush A, Castro M, Sterk PJ, Adcock IM, Bateman ED, Bel EH, Bleecker ER, Boulet LP, Brightling C, Chanez P, Dahlen SE, Djukanovic R, Frey U, Gaga M, Gibson P, Hamid Q, Jajour NN, Mauad T, Sorkness RL, Teague WG. International ERS/ATS guidelines on definition, evaluation and treatment of severe asthma. *Eur Respir J*. 2014 Feb;43:343-73.
20. "International ERS/ATS guidelines on definition, evaluation and treatment of severe asthma." Kian Fan Chung, Sally E. Wenzel, Jan L. Brozek, Andrew Bush, Mario Castro, Peter J. Sterk, Ian M. Adcock, Eric D. Bateman, Elisabeth H. Bel, Eugene R. Bleecker, Louis-Philippe Boulet, Christopher Brightling, Pascal Chanez, Sven-Erik Dahlen, Ratko Djukanovic, Urs Frey, Mina Gaga, Peter Gibson, Qutayba Hamid, Nizar N. Jajour, Thais Mauad, Ronald L. Sorkness and W. Gerald Teague. *Eur Respir J* 2014; 43: 343-373. *Eur Respir J*. 2018;52(1). pii: 1352020.
21. Miller MR, Hankinson J, Brusasco V, et al. Standardisation of spirometry. *Eur Respir J* 2005;26:319–38. doi:10.1183/09031936.05.00034805
22. Coates AL, Wanger J, Cockcroft DW, Culver BH; Bronchoprovocation Testing Task Force: Kai-Håkon Carlsen, Diamant Z, Gauvreau G, Hall GL, Hallstrand TS, Horvath I, de Jongh FHC, Joos G, Kaminsky DA, Laube BL, Leuppi JD, Sterk PJ. ERS technical standard on bronchial challenge testing: general considerations and performance of methacholine challenge tests. *Eur Respir J*. 2017 May 1;49(5). pii:1601526.



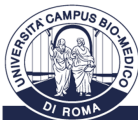

23. Miller MR, Hankinson J, Brusasco V, et al. Standardisation of spirometry. *Eur Respir J* 2005;26:319–38. doi:10.1183/09031936.05.00034805
24. Dweik RA, Boggs PB, Erzurum SC, Irvin CG, Leigh MW, Lundberg JO et al (2011) An official ATS clinical practice guideline: interpretation of exhaled nitric oxide levels (FENO) for clinical applications. *Am J Respir Crit Care Med* 184:602–615
25. Johnsson M1, Bove M, Bergquist H, Olsson M, Fornwall S, Hassel K, Wold AE, Wennerås C. Distinctive blood eosinophilic phenotypes and cytokine patterns in eosinophilic esophagitis, inflammatory bowel disease and airway allergy. *J Innate Immun.* 2011;3(6):594-604. doi: 10.1159/000331326. Epub 2011 Sep 13.
